# Supplementary material for: CpG promoter hypo-methylation and up-regulation of microRNA-190b in hormone receptor-positive breast cancer
Source: PubMed Central journal article supplement (PMC6659800; doi:10.18632/oncotarget.27083), 2019-07-23
Supplement: oncotarget-10-4664-s001.pdf [file oncotarget-10-4664-s001.pdf]

## CpG promoter hypo-methylation and up-regulation of microRNA-190b in hormone receptor-positive breast cancer

### SUPPLEMENTARY MATERIALS

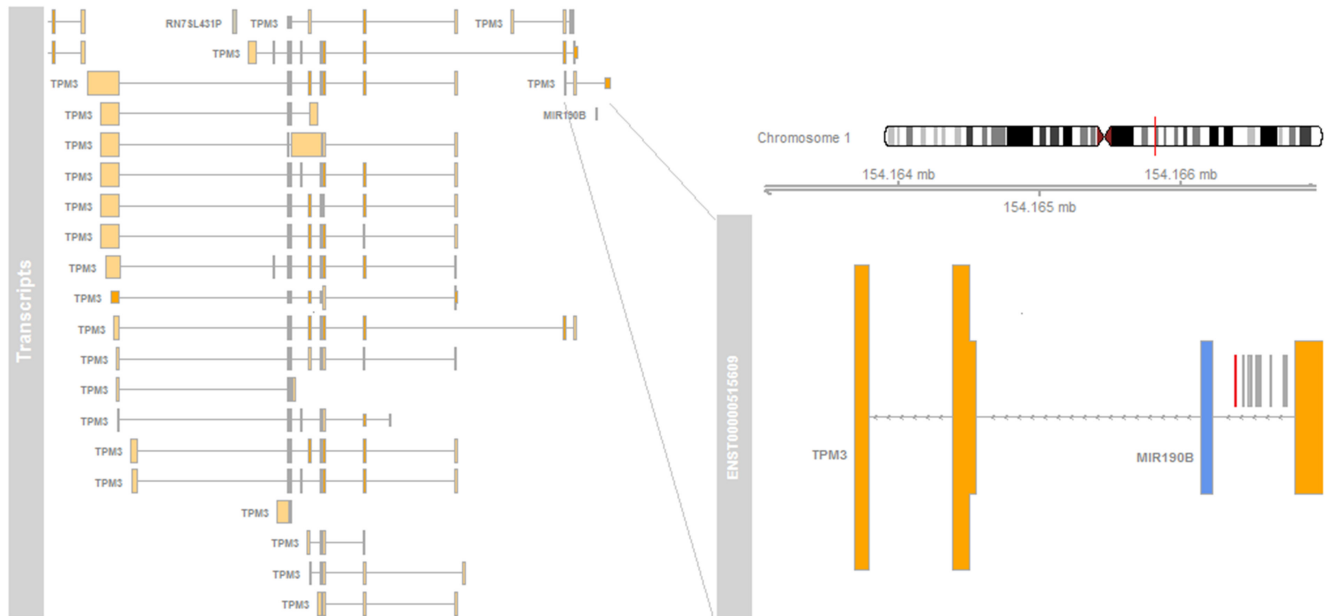

**Supplementary Figure 1: MiR-190b's genetic location and upstream CpG's.** MiR-190b is situated within the TPM3 transcript ENST00000515609. CpG's upstream from MiR-190b within the transcript are labelled as gray ticks. The CpG analysed in this study is labelled as a red tick.

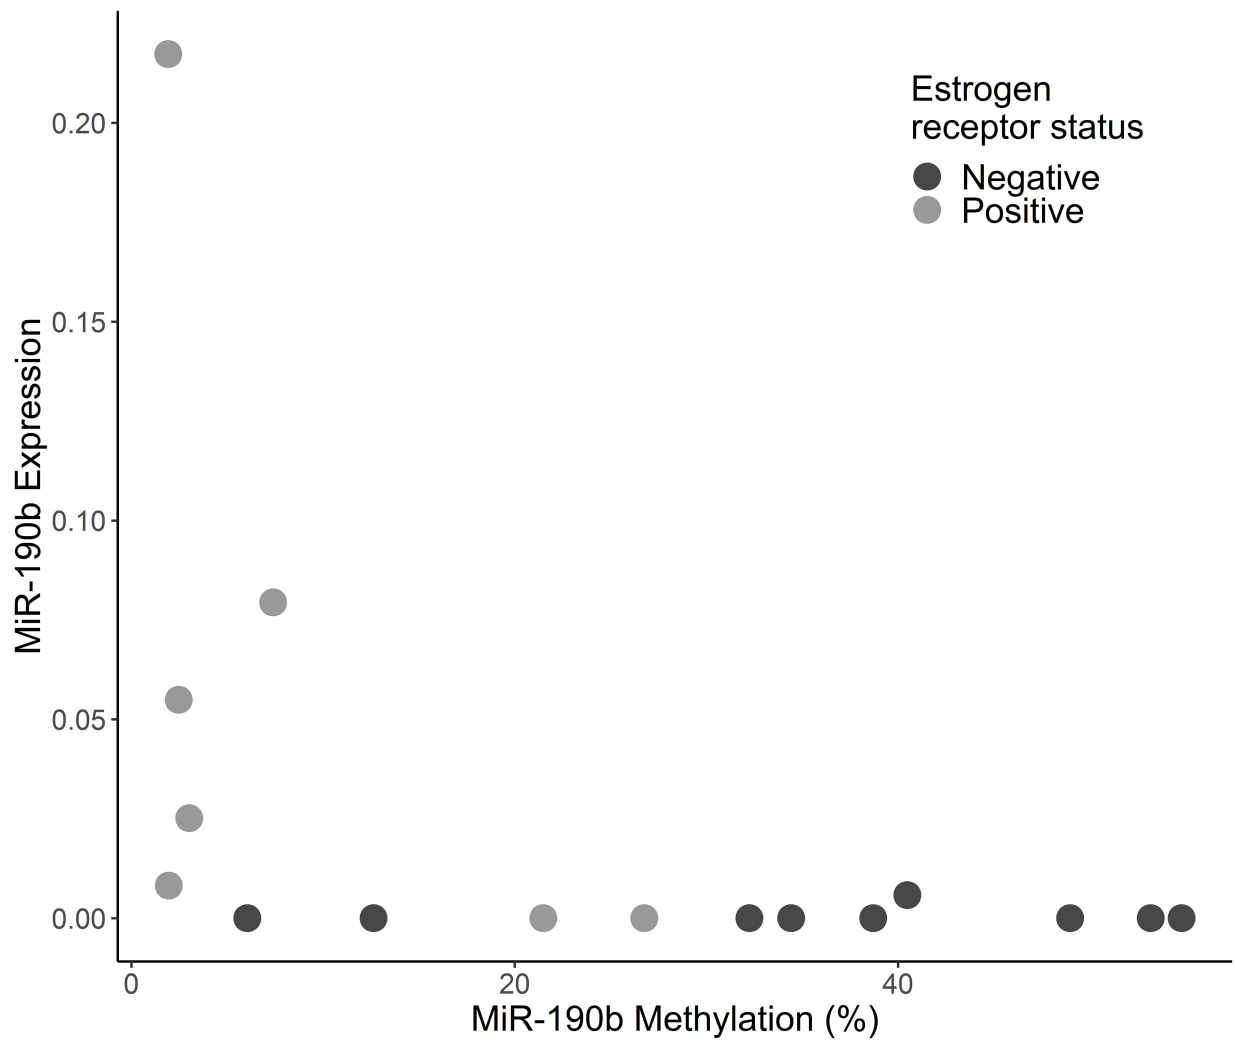

**Supplementary Figure 2: MiR-190b mRNA expression and CpG promoter methylation in breast cancer cell lines.** Spearman's rho correlation analysis was significant,  $R^2 = -0.68$ ,  $p = 0.004$ ,  $n = 16$ .

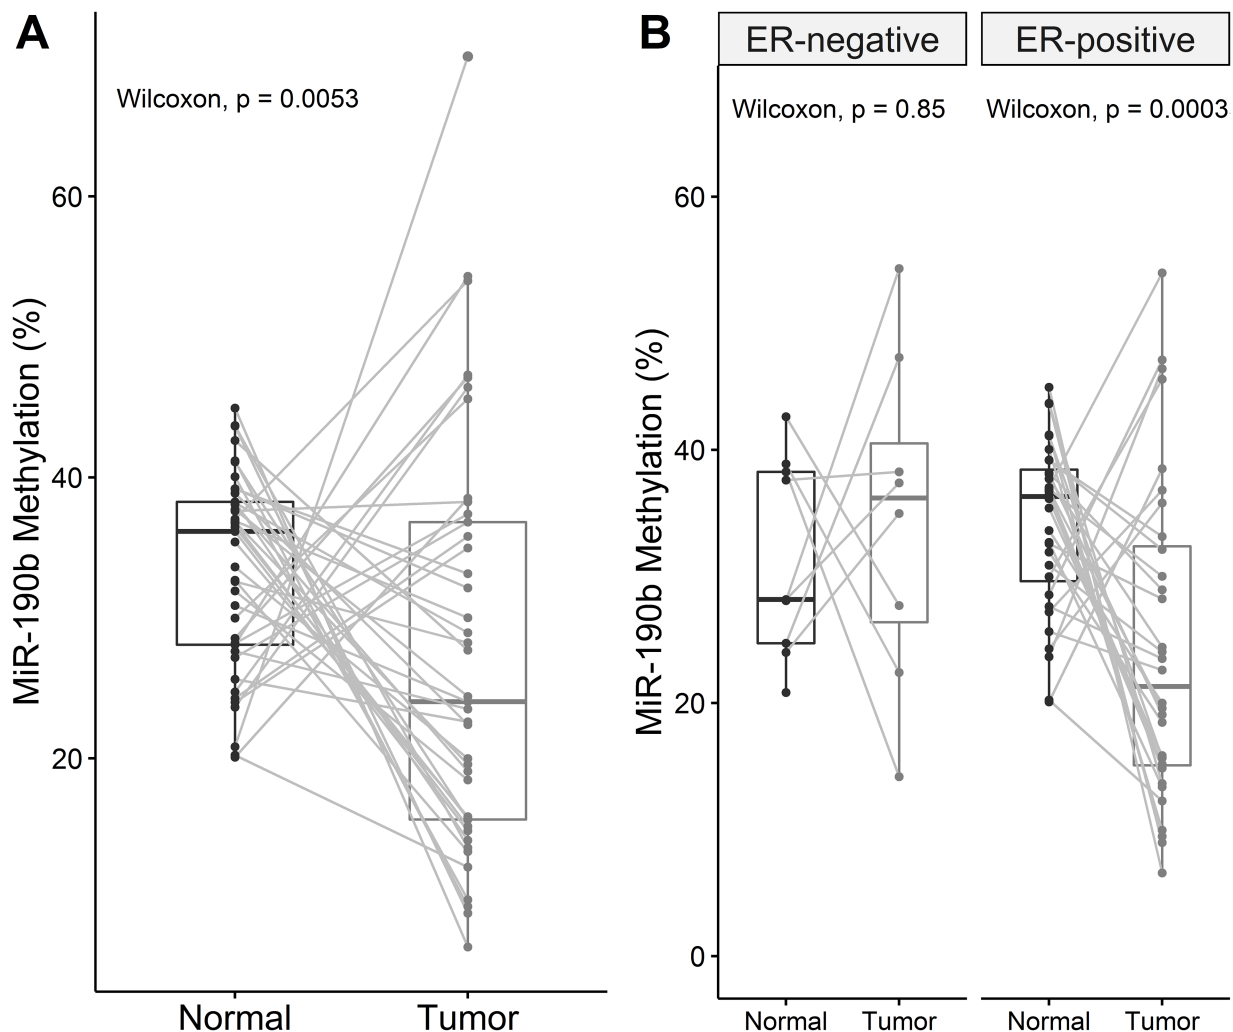

**Supplementary Figure 3: MiR-190b pairwise methylation status in tumor and normal tissue.** (A) pairwise comparison of miR-190b methylation status between breast tumors and normal breast tissue ( $n = 43$ ) (Wilcoxon signed rank test,  $P = 0.046$ ). (B) After dividing tumor tissue into their according ER status. ER+ tumors ( $n = 32$ ) have significantly lower miR-190b methylation comparing to normal breast tissue (Wilcoxon signed rank test,  $P = 0.006$ ). MiR-190b expression in ER- breast tumors ( $n = 9$ ) is not significantly different from normal breast tissue (Wilcoxon rank sum test,  $P = 0.48$ ).

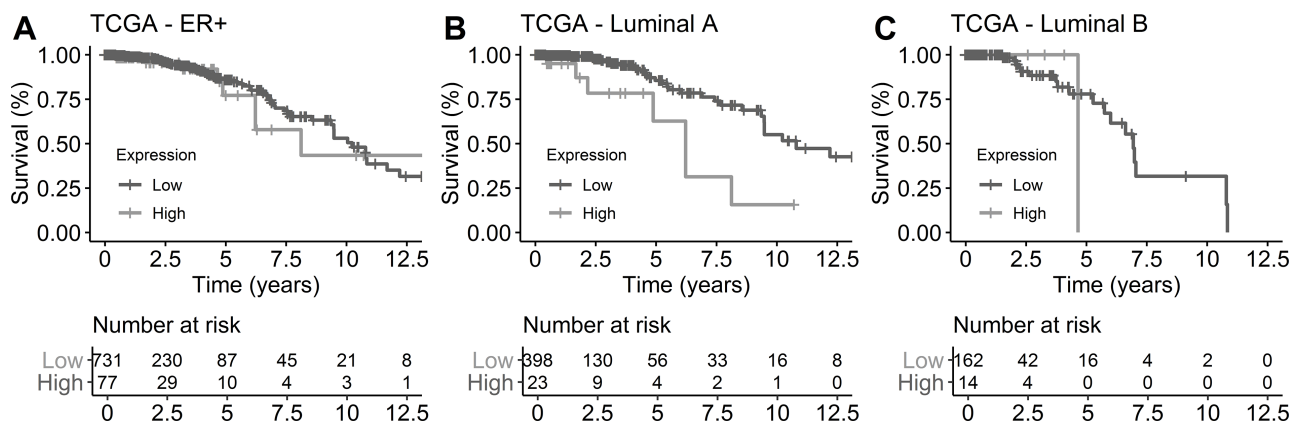

**Supplementary Figure 4: Overall survival from TCGA.** Cutoff of high and low expression was set at the upper quartile of expression levels for normal tissue from TCGA and analyzed using Cox regression. (A) ER+ breast cancer patient (HR = 0.36, CI 0.29-1.34,  $P = 0.22$ ). (B) LumA breast cancer patients (HR = 0.26, CI 0.11-0.60,  $P = 0.0016$ ). (C) LumB breast cancer patients (HR = 0.63, CI 0.08-5.02,  $P = 0.66$ ). All analysis are corrected for age at diagnosis.

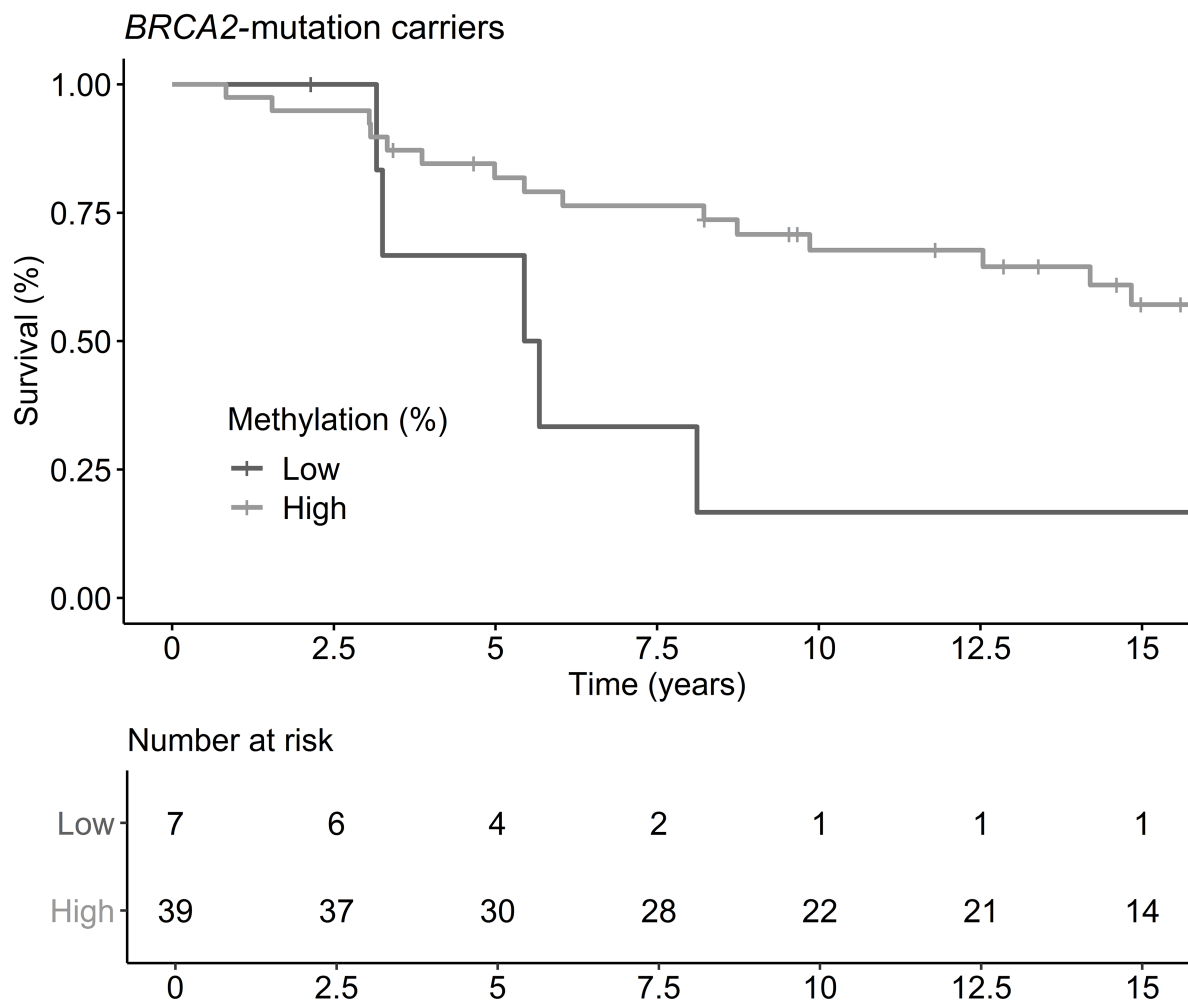

**Supplementary Figure 5: Breast cancer specific survival within *BRCA2*<sup>999del15</sup> mutation carriers by miR-190b methylation status. (HR = 0.30, 95% CI 0.39-4.69, *P* = 0.469).**

**Supplementary Table 1: Cell lines**

| Cell line     | Subtype                                                   | ER                                       | PR                                       | HER                                         | CK5/6             | EGFR               | Ki-67               |
|---------------|-----------------------------------------------------------|------------------------------------------|------------------------------------------|---------------------------------------------|-------------------|--------------------|---------------------|
| BT-474        | Lum <sub>B(12)</sub> , Lum <sub>(13)</sub>                | - <sub>(12)</sub> ,<br>+ <sub>(13)</sub> | + <sub>(12)</sub> , + <sub>(13)</sub>    | 3+ <sub>(12)</sub> , + <sub>(13)</sub>      | - <sub>(12)</sub> | 1+ <sub>(12)</sub> | 70 <sub>(12)</sub>  |
| CAMA-1        | Lum <sub>(13)</sub>                                       | + <sub>(13)</sub>                        | - <sub>(13)</sub>                        | - <sub>(13)</sub>                           |                   |                    |                     |
| HCC38         | Basal-like B <sub>(13)</sub>                              | - <sub>(13)</sub>                        | - <sub>(13)</sub>                        | - <sub>(13)</sub>                           |                   |                    |                     |
| HCC1937       | Basal-like A <sub>(13)</sub>                              | - <sub>(13)</sub>                        | - <sub>(13)</sub>                        | - <sub>(13)</sub>                           |                   |                    |                     |
| HCC1428       | Lum <sub>(13)</sub>                                       | + <sub>(13)</sub>                        | + <sub>(13)</sub>                        | - <sub>(13)</sub>                           |                   |                    |                     |
| HCC1500       | Basal-like B <sub>(13)</sub>                              | - <sub>(13)</sub>                        | - <sub>(13)</sub>                        | - <sub>(13)</sub>                           |                   |                    |                     |
| MCF7          | LumA <sub>(12)</sub> , Lum <sub>(13)</sub>                | + <sub>(12)</sub> , + <sub>(13)</sub>    | + <sub>(12)</sub> , + <sub>(13)</sub>    | 0-1+ <sub>(12)</sub>                        | - <sub>(12)</sub> | 1+ <sub>(12)</sub> | 90 <sub>(12)</sub>  |
| MCF10a        | Basal-like <sub>(12)</sub> , Basal-like B <sub>(13)</sub> | - <sub>(12)</sub> ,<br>- <sub>(13)</sub> | - <sub>(12)</sub> ,<br>- <sub>(13)</sub> | 0-1+ <sub>(12)</sub> ,<br>- <sub>(13)</sub> | + <sub>(12)</sub> | 2+ <sub>(12)</sub> | 30 <sub>(12)</sub>  |
| MDA-MB-134-VI | Lum <sub>(13)</sub>                                       | + <sub>(13)</sub>                        | - <sub>(13)</sub>                        | - <sub>(13)</sub>                           |                   |                    |                     |
| MDA-MB-231    | Basal <sub>(12)</sub> ,<br>Basal-like B <sub>(13)</sub>   | - <sub>(12)</sub> ,<br>- <sub>(13)</sub> | - <sub>(12)</sub> ,<br>- <sub>(13)</sub> | 0-1 <sub>(12)</sub> ,<br>- <sub>(13)</sub>  | - <sub>(12)</sub> | 1 <sub>(12)</sub>  | 100 <sub>(12)</sub> |
| MDA-MB-435    | HER2 <sub>(12)</sub> , Basal-like B <sub>(13)</sub>       | - <sub>(12)</sub> ,<br>- <sub>(13)</sub> | - <sub>(12)</sub> ,<br>- <sub>(13)</sub> | 3+ <sub>(12)</sub> ,<br>- <sub>(13)</sub>   | - <sub>(12)</sub> | 0 <sub>(12)</sub>  | 80 <sub>(12)</sub>  |
| MDA-MB-436    | Basal-like B <sub>(13)</sub>                              | - <sub>(13)</sub>                        | - <sub>(13)</sub>                        | - <sub>(13)</sub>                           |                   |                    |                     |
| MDA-MB-468    | Basal-like A <sub>(13)</sub>                              | - <sub>(13)</sub>                        | - <sub>(13)</sub>                        | - <sub>(13)</sub>                           |                   |                    |                     |
| SK-BR-3       | HER2 <sub>(12)</sub> , Lum <sub>(13)</sub>                | - <sub>(12)</sub> ,<br>- <sub>(13)</sub> | - <sub>(12)</sub> ,<br>- <sub>(13)</sub> | 3+ <sub>(12)</sub> , + <sub>(13)</sub>      | - <sub>(12)</sub> | 2+ <sub>(12)</sub> | 20 <sub>(12)</sub>  |
| T47D          | Lum <sub>(13)</sub>                                       | + <sub>(13)</sub>                        | + <sub>(13)</sub>                        | - <sub>(13)</sub>                           |                   |                    |                     |
| ZR-75-1       | Lum <sub>(13)</sub>                                       | + <sub>(13)</sub>                        | - <sub>(13)</sub>                        | - <sub>(13)</sub>                           |                   |                    |                     |

**Supplementary Table 2: Tumor characteristics according to miR-190b methylation status**

| Stratified by miR-190b methylation |            | Hypo-methylation | Methylation | <i>p</i> -value | Corrected for ER |
|------------------------------------|------------|------------------|-------------|-----------------|------------------|
| <i>n</i>                           |            | 156              | 464         |                 |                  |
| Estrogen receptor status (%)       | Neg        | 16 (12.8)        | 97 (32.7)   | < 0.001         |                  |
|                                    | Pos        | 109 (87.2)       | 200 (67.3)  |                 |                  |
| Progesteron receptor status (%)    | Neg        | 42 (33.9)        | 151 (50.7)  | 0.002           | Insignificant    |
|                                    | Pos        | 82 (66.1)        | 147 (49.3)  |                 |                  |
| HER2 status (%)                    | Neg        | 41 (67.2)        | 106 (58.2)  | 0.276           |                  |
|                                    | Pos        | 20 (32.8)        | 76 (41.8)   |                 |                  |
| Ki67 status (%)                    | Neg        | 34 (59.6)        | 66 (37.3)   | 0.005           |                  |
|                                    | Pos        | 23 (40.4)        | 111 (62.7)  |                 |                  |
| Nodal Metastases (%)               | No         | 8 (50.0)         | 20 (45.5)   | 0.984           |                  |
|                                    | Yes        | 8 (50.0)         | 24 (54.5)   |                 |                  |
| Year of diagnosis (%)              | 1969–1989  | 49 (31.4)        | 150 (32.3)  | 0.837           |                  |
|                                    | 1990–1992  | 27 (17.3)        | 89 (19.2)   |                 |                  |
|                                    | 1993–1994  | 39 (25.0)        | 119 (25.6)  |                 |                  |
|                                    | 1995–2007  | 41 (26.3)        | 106 (22.8)  |                 |                  |
| Tumor size mm (%)                  | 5–15       | 9 (30.0)         | 27 (27.8)   | 0.097           | Insignificant    |
|                                    | 16–22      | 10 (33.3)        | 21 (21.6)   |                 |                  |
|                                    | 23–33      | 2 (6.7)          | 27 (27.8)   |                 |                  |
|                                    | 34–Over    | 9 (30.0)         | 22 (22.7)   |                 |                  |
| Grade (%)                          | 1          | 3 (23.1)         | 7 (9.1)     | 0.330           |                  |
|                                    | 2          | 4 (30.8)         | 35 (45.5)   |                 |                  |
|                                    | 3          | 5 (38.5)         | 33 (42.9)   |                 |                  |
|                                    | *Other     | 1 (7.7)          | 2 (2.6)     |                 |                  |
| TNM Stage (%)                      | I          | 3 (18.8)         | 9 (18.6)    | 0.592           |                  |
|                                    | IIa        | 4 (25.0)         | 13 (30.2)   |                 |                  |
|                                    | IIb        | 5 (31.2)         | 8 (18.6)    |                 |                  |
|                                    | IIIa       | 3 (18.8)         | 5 (11.6)    |                 |                  |
|                                    | IIIb       | 0 (0.0)          | 6 (14.0)    |                 |                  |
|                                    | *IV        | 1 (6.2)          | 2 (4.7)     |                 |                  |
| Age of diagnosis (%)               | 30–40      | 10 (6.4)         | 56 (12.3)   | 0.013           | Insignificant    |
|                                    | 41–50      | 33 (21.2)        | 126 (27.7)  |                 |                  |
|                                    | 51–60      | 38 (24.4)        | 117 (25.7)  |                 |                  |
|                                    | 61–70      | 39 (25.0)        | 92 (20.2)   |                 |                  |
|                                    | 70-Over    | 36 (23.1)        | 64 (14.1)   |                 |                  |
| Sample type (%)                    | Normal     | 1 (0.6)          | 70 (15.1)   | < 0.001         |                  |
|                                    | Tumor      | 155 (99.4)       | 394 (84.9)  |                 |                  |
| Subtype (%)                        | *5NP       | 0 (0.0)          | 7 (5.0)     | 0.008           |                  |
|                                    | Basal-like | 3 (6.8)          | 29 (20.6)   |                 |                  |
|                                    | HER2       | 1 (2.3)          | 14 (9.9)    |                 |                  |
|                                    | LumA       | 25 (56.8)        | 45 (31.9)   |                 |                  |
|                                    | LumB       | 15 (34.1)        | 46 (32.6)   |                 |                  |

\*Expected values over 5 was un-obtainable by simplification of groups. Exclusion of these groups does not change outcome.
